# Supplementary material for: Molecular Dynamics Simulation of Polymer Nanocomposites with Supramolecular Network Constructed via Functionalized Polymer End-Grafted Nanoparticles
Source: MDPI journal article supplement (doi:10.3390/polym15153259), 2023-07-31
Supplement: s1 [file s1]

# Supplementary Materials

## Molecular Dynamics Simulation of Polymer Nanocomposites with Supramolecular Network Constructed via Functionalized Polymer End-Grafted Nanoparticles

Guanyi Hou <sup>1,\*</sup>, Runhan Ren <sup>1</sup>, Wei Shang <sup>1</sup>, Yunxuan Weng <sup>1,\*</sup> and Jun Liu <sup>2</sup>

<sup>1</sup> College of Chemistry and Materials Engineering, Beijing Technology and Business University, Beijing 100048, China; renrunhan@163.com (R.R.); herzflut@foxmail.com (W.S.)

<sup>2</sup> Center of Advanced Elastomer Materials, Beijing University of Chemical Technology, Beijing 100029, China; lj200321039@163.com

\* Correspondence: hgy1939916@163.com (G.H.); wyxuan@th.btbu.edu.cn (Y.W.)

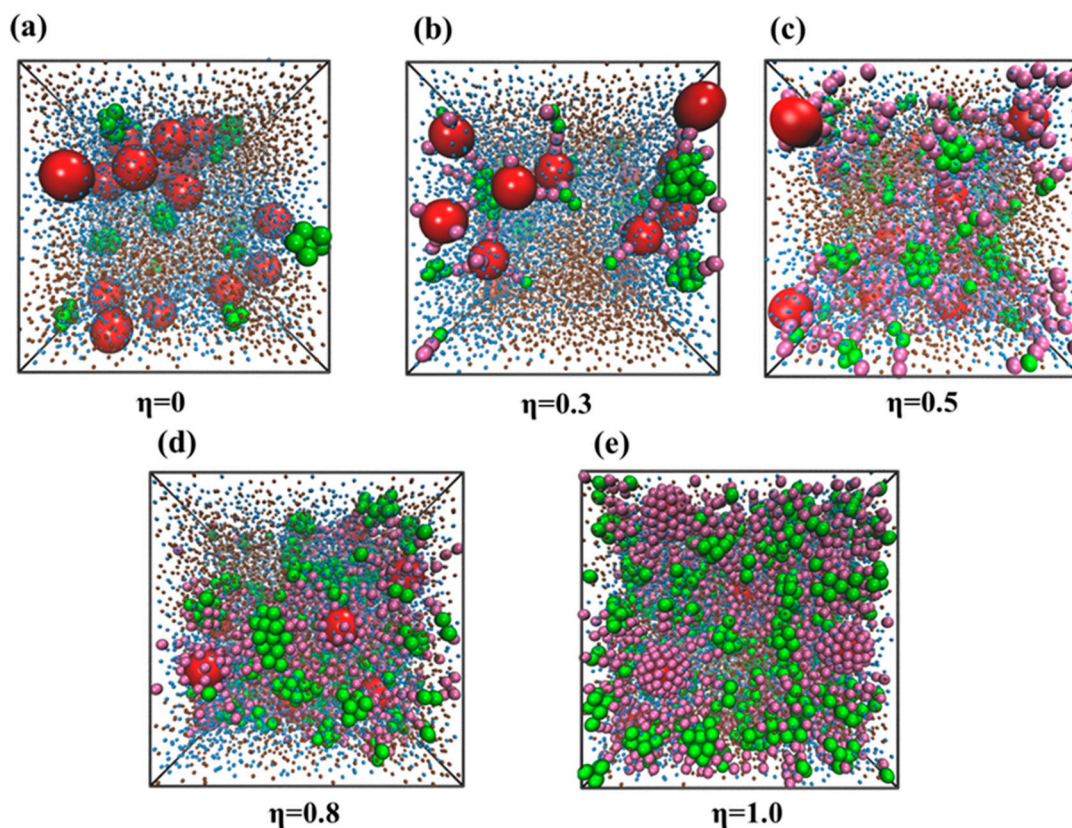

**Figure S1.** the snapshot of PNCs with different  $\eta$ , where: (a)  $\eta = 0$ ; (b)  $\eta = 0.3$ ; (c)  $\eta = 0.5$ ; (d)  $\eta = 0.8$ ;

(e)  $\eta = 1.0$ .

**Table S1.** the mean-square root radius of gyration of modified-NP ( $R_g$ )

| System       | Mean-square root radius of gyration of<br>modified-NP ( $\sigma$ ) |
|--------------|--------------------------------------------------------------------|
| $\eta = 0$   | 2.0                                                                |
| $\eta = 0.3$ | 5.07                                                               |
| $\eta = 0.5$ | 5.51                                                               |
| $\eta = 0.8$ | 5.79                                                               |
| $\eta = 1.0$ | 5.96                                                               |

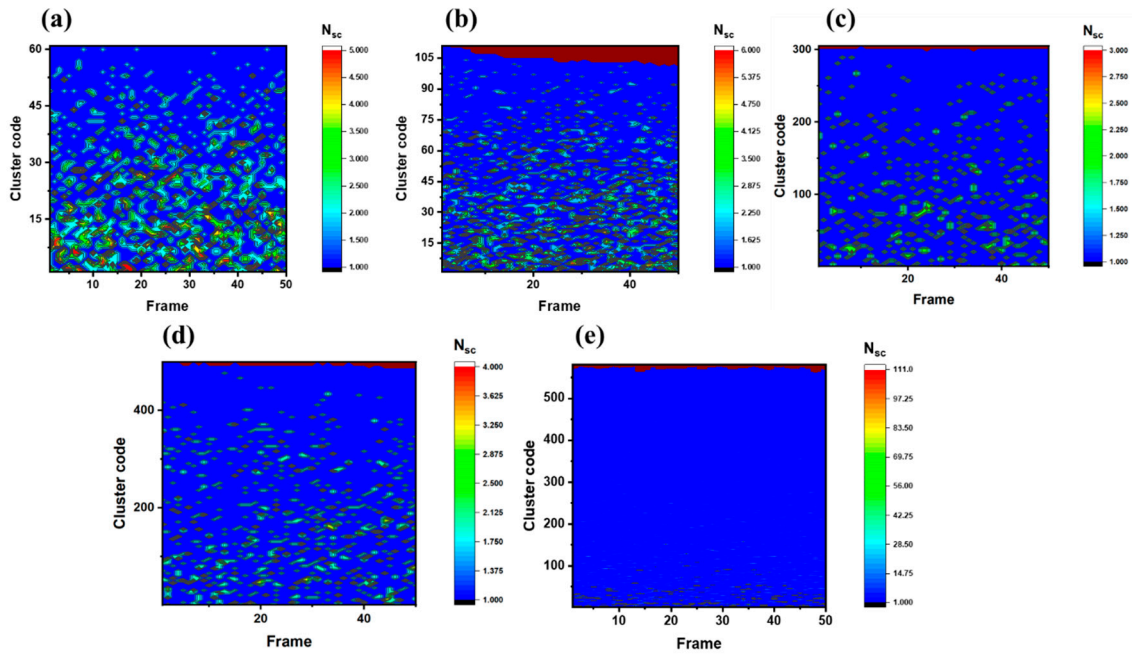

**Figure S2.** The size and distribution of clusters, which are formed by the modified group, with various sphericity ( $\eta$ ) where (a)  $\eta = 0$ ; (b)  $\eta = 0.3$ ; (c)  $\eta = 0.5$ ; (d)  $\eta = 0.8$  and (e)  $\eta = 1.0$ .

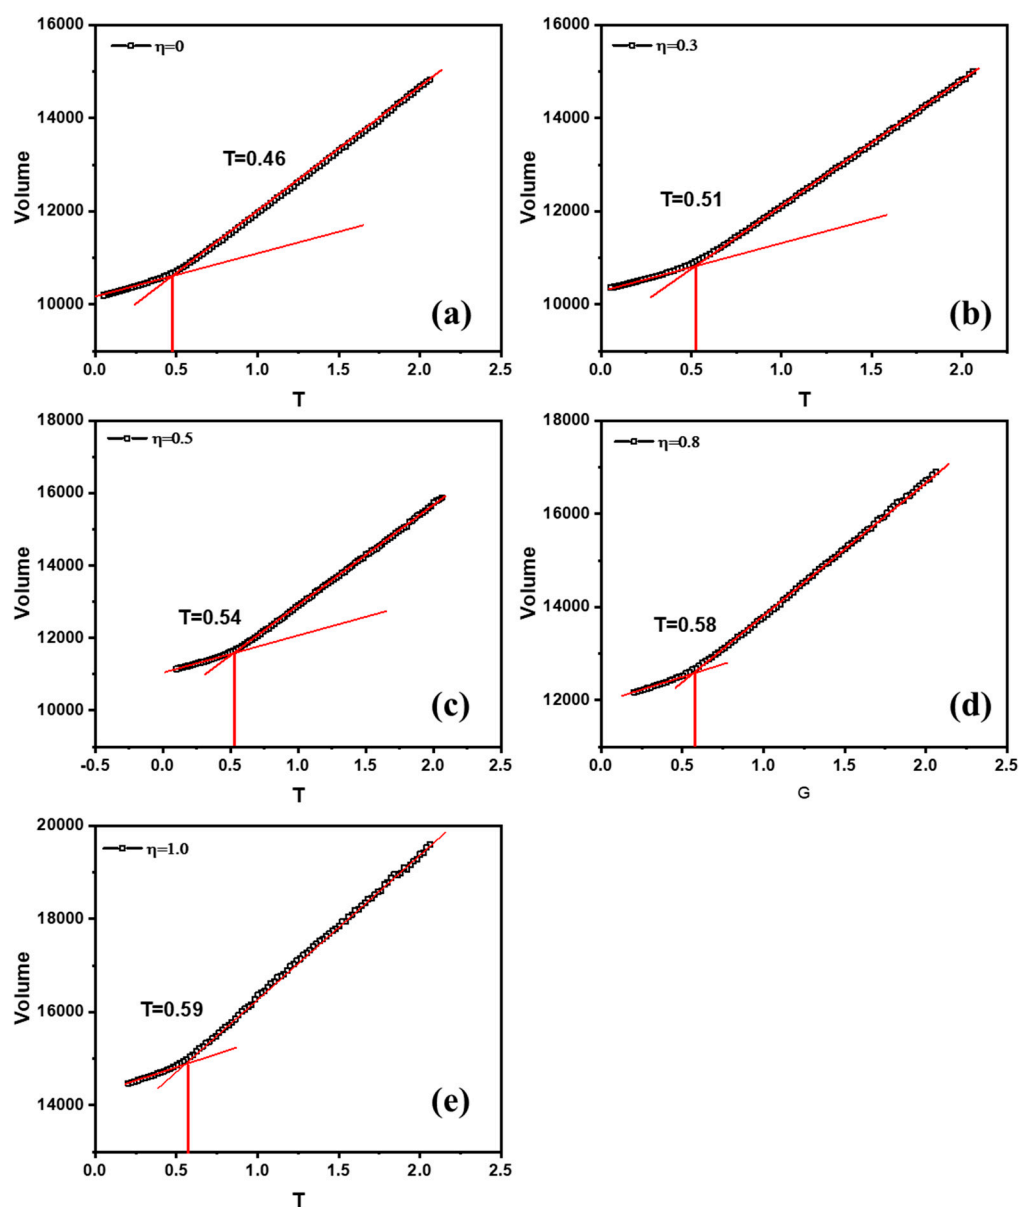

**Figure S3.** The glass transition temperature ( $T_g$ ) obtained by the specific volume versus the temperature

for different  $\eta$ , where (a)  $\eta = 0$ ; (b)  $\eta = 0.3$ ; (c)  $\eta = 0.5$ ; (d)  $\eta = 0.8$  and (e)  $\eta = 1.0$ .
